# Supplementary material for: In situ single molecule detection of insulin receptors on erythrocytes from a type 1 diabetes ketoacidosis patient by atomic force microscopy
Source: Royal Society of Chemistry journal article supplement (doi:10.1039/c5an01417d), 2015-01-01
Supplement: c5an01417d1.pdf [file c5an01417d1.pdf]

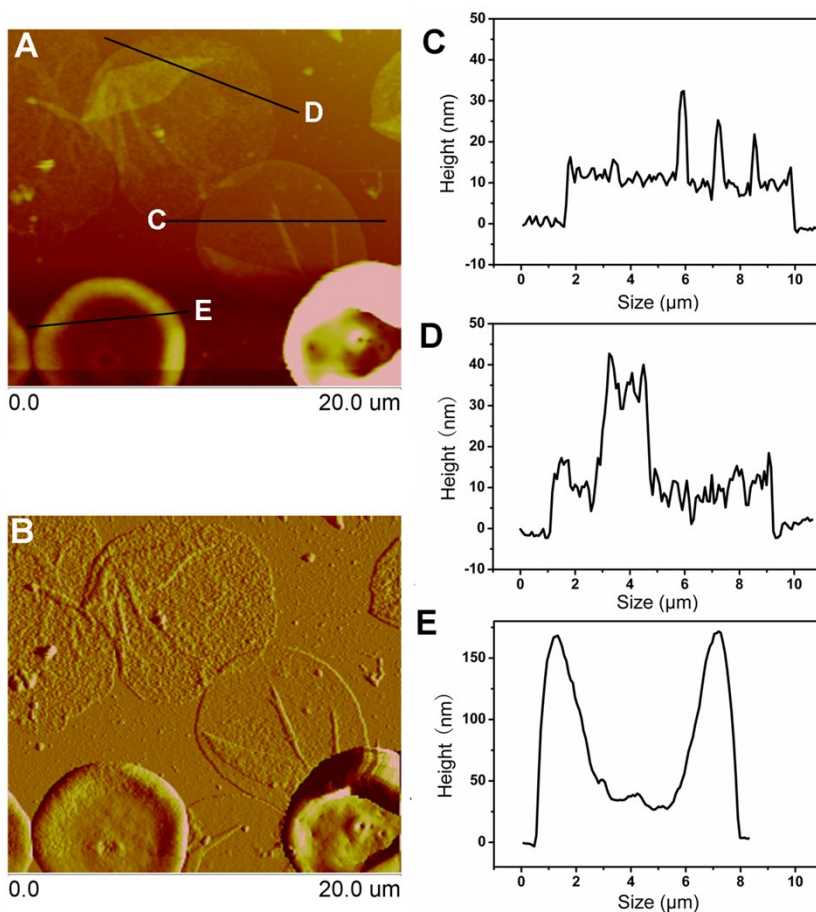

Fig.S1 AFM images of the membrane leaflets from T1-DKA erythrocytes. (A) The morphology and (B) peak force error of membrane leaflets from T1-DKA erythrocytes. (C, D) Height distribution of single layer membrane leaflets of an average height of 10 nm. (E) Height distribution of erythrocyte after hemolysis effect induced by low permeability PBS solution.

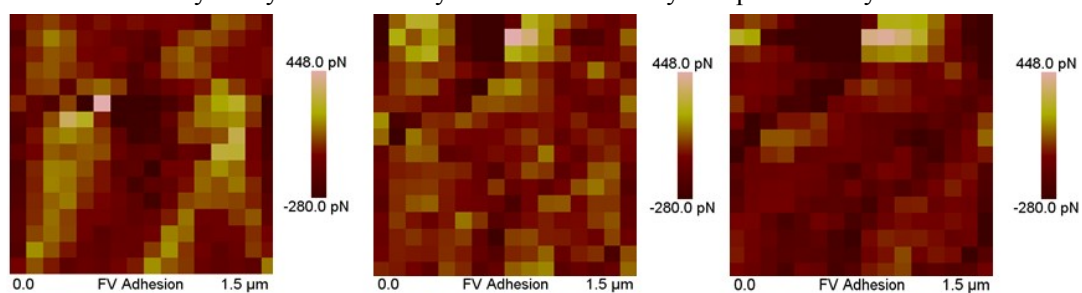

Fig.S2 Three typical force recognition maps obtained on healthy erythrocytes by AFM tips modified with COOH-PEG-COOH, and EDC, NHS without insulin.
